# Supplementary material for: Bioinspired aerobic oxidation of alcohols with a bifunctional ligand based on bipyridine and TEMPO
Source: Royal Society of Chemistry journal article supplement (doi:10.1039/c6ra05536b), 2016-01-01

## Supporting Information

### Bioinspired Aerobic Oxidation of Alcohols with a Bifunctional Ligand Based on Bipyridine and TEMPO

Lianyue Wang,<sup>a,\*</sup> Zhixing Bie,<sup>c</sup> Sensen Shang,<sup>a,b</sup> Ying Lv,<sup>a</sup> Guosong Li,<sup>a</sup> Jingyang Niu,<sup>c,\*</sup> and Shuang Gao<sup>a,\*</sup>

<sup>a</sup> Dalian Institute of Chemical Physics, Chinese Academy of Sciences, Dalian National Laboratory for Clean Energy (DNL), 457 Zhongshan Road, Dalian, 116023, China. Fax: (+86) 0411-84379248; phone: (+86) 0411-84379248; E-mail: sgao@dicp.ac.cn; lianyuewang@dicp.ac.cn

<sup>b</sup> University of the Chinese Academy of Sciences, 19A Yuquan Road, Beijing, 100049, China

<sup>c</sup> Henan Key Laboratory of Polyoxometalate Chemistry, Institute of Molecular and Crystal Engineering, College of Chemistry and Chemical Engineering, Henan University, Kaifeng, Henan 475004, China Fax: (+86) 371-23886876; E-mail: jyniu@henu.edu.cn.

| <b>Table of Contents</b>                                         | <b>Page</b>   |
|------------------------------------------------------------------|---------------|
| <b>Table 1S</b>                                                  | <b>S2-S3</b>  |
| <b>The Synthetic Procedure and Characterization of bpy-TEMPO</b> | <b>S4</b>     |
| <b>Copies of NMR Spectra</b>                                     | <b>S5-S14</b> |

**Table 1S** Previous work on air/oxygen-based aerobic alcohol oxidations employing the copper and TEMPO catalytic system

| Entry | Substrate scope                              | Catalyst system                                                                                                                                      | Ligand  | Reaction conditions                                                       | Yields (%)     | Examples | Ref |
|-------|----------------------------------------------|------------------------------------------------------------------------------------------------------------------------------------------------------|---------|---------------------------------------------------------------------------|----------------|----------|-----|
| 1     | Benzylic, allylic, 1° aliphatic              | 10mol%CuCl, 10mol% TEMPO                                                                                                                             |         | DMF, rt, 1 atm O <sub>2</sub> , 1-7 h                                     | 85-96          | 8        | 1   |
| 2     | Benzylic, allylic, 1° and 2° aliphatic       | 2mol% CuBr <sub>2</sub> ·Me <sub>2</sub> S, 2mol% L1, 3.5-10 mol% TEMPO                                                                              | L1      | C <sub>8</sub> F <sub>17</sub> Br/PhCl, 90 °C, O <sub>2</sub> , 1-10 h    | 69-97          | 21       | 2   |
| 3     | Benzylic, allylic, 1°aliphatic               | 5 mol% CuBr <sub>2</sub> , 5 mol% L2, 5 mol% <i>t</i> -BuOK,                                                                                         | L2      | CH <sub>3</sub> CN:H <sub>2</sub> O = 2:1, rt, air, 2.5-24 h              | 61-100         | 4        | 3   |
| 4     | Benzylic, allylic, 1°aliphatic               | 5 mol% TEMPO, 5 mol% complex                                                                                                                         | complex | Toluene, 100 °C, O <sub>2</sub> , 9-26 h                                  | 70-99          | 12       | 4   |
| 5     | Benzylic, allylic, 1°aliphatic               | 3 mol% CuBr <sub>2</sub> or Cu(OTf) <sub>2</sub> , 3 mol% L2, 6 mol% NMI or DBU                                                                      | L2      | CH <sub>3</sub> CN, rt, 1 atm O <sub>2</sub> , 1-5 h,                     | 55-94          | 11       | 5   |
| 6     | Benzylic, allylic, 1°aliphatic               | 5 mol% CuBr <sub>2</sub> , 5 mol% L3, 5 mol% <i>t</i> -BuOK,                                                                                         | L3      | CH <sub>3</sub> CN:H <sub>2</sub> O = 2:1, rt, air, 84 h                  | 64-96          | 17       | 6   |
| 7     | Benzylic, allylic, propargylic, 1° aliphatic | 5mol% Cu(CH <sub>3</sub> CN) <sub>4</sub> X, X = OTf, BF <sub>4</sub> <sup>-</sup> , PF <sub>6</sub> <sup>-</sup> , 5mol%L2, 5mol%TEMPO, 10 mol% NMI | L2      | CH <sub>3</sub> CN, rt, air or O <sub>2</sub> , 1-24 h                    | 79-98          | 37       | 7   |
| 8     | Benzyl alcohol                               | 5mol%CuBr <sub>2</sub> , 5mol%L4, 5mol% <i>t</i> -BuOK                                                                                               | L4      | CH <sub>3</sub> CN:H <sub>2</sub> O = 2:1, 50 °C, O <sub>2</sub> , 24 h   | 84 (conv.)     | 1        | 8   |
| 9     | Benzylic, allylic, 1°aliphatic               | 5mol%CuBr <sub>2</sub> , 5mol%L5, 5mol% <i>t</i> -BuOK                                                                                               | L5      | CH <sub>3</sub> CN:H <sub>2</sub> O = 2:1, 50 °C, O <sub>2</sub> , 2-10 h | 61-100 (conv.) | 3        | 9   |
| 10    | Benzylic, allylic, propargylic, 1° aliphatic | 10mol%Cu, 10 mol% L6                                                                                                                                 | L6      | C <sub>6</sub> H <sub>5</sub> Cl, 80 °C, air, 15 h                        | trace to 99    | 25       | 10  |
| 11    | Benzylic, allylic, 1°aliphatic               | 0.5mol%L7, 0.5mol% [Cu(MeCN) <sub>4</sub> ]OTf, 1 mol% NMI                                                                                           | L7      | CH <sub>3</sub> CN, rt, air, 3-24 h                                       | 94-99          | 8        | 11  |

|    |                                                   |                                         |   |                                          |       |    |                     |
|----|---------------------------------------------------|-----------------------------------------|---|------------------------------------------|-------|----|---------------------|
| 12 | 1° and 2° benzylic, allylic, alkynyl, 1°aliphatic | 5 mol% CuI,<br>5 mol% L,<br>10 mol% NMI | L | CH <sub>3</sub> CN, rt, air,<br>1.5-24 h | 72-99 | 28 | <b>Present work</b> |
|----|---------------------------------------------------|-----------------------------------------|---|------------------------------------------|-------|----|---------------------|

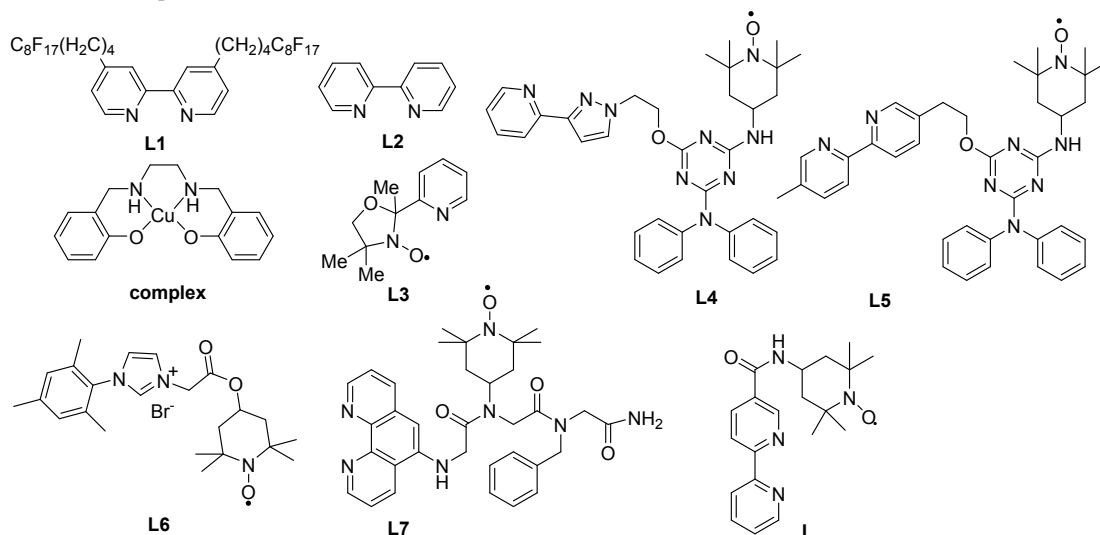

## References

- 1 M. F. Semmelhack, C. R. Schmid, D. A. Cortés and C. S. Chou, *J. Am. Chem. Soc.*, 1984, **106**, 3374–3376.
- 2 B. Betzemeier, M. Cavazzini, S. Quici and P. Knochel, *Tetrahedron Lett.*, 2000, **41**, 4343–4346.
- 3 P. Gamez, I. W. C. E. Arends, J. Reedijk and R. A. Sheldon, *Chem. Commun.*, 2003, 2414–2415.
- 4 S. Velusamy, A. Srinivasan and T. Punniyamurthy, *Tetrahedron Lett.*, 2006, **47**, 923–926.
- 5 E. T. T. Kumpulainen and A. M. P. Koskinen, *Chem. -Eur. J.* 2009, **15**, 10901–10911.
- 6 C. J. Gartshore and D. W. Lupton, *Adv. Synth. Catal.* 2010, **352**, 3321–3328.
- 7 J. M. Hoover, and S. S. Stahl, *J. Am. Chem. Soc.* 2011, **133**, 16901–16910.
- 8 Z. Lu, J. S. Costa, O. Roubeau, I. Mutikainen, U. Turpeinen, S. J. Teat, P. Gamez and J. Reedijk, *Dalton Trans.* 2008, 3567–3573.
- 9 Z. Lu, T. Ladrak, O. Roubeau, J. van der Toorn, S. J. Teat, C. Massera, P. Gamez and J. Reedijk, *Dalton Trans.* 2009, 3559–3570.
- 10 X. L. Liu, Q. Q. Xia, Y. J. Zhang, W. Z. Chen and C. Y. Chen, *J. Org. Chem.*, 2013, **78**, 8531–8536.
- 11 K. J. Prathap and G. Maayan, *Chem. Commun.*, 2015, **51**, 11096–11099.

## The Synthetic Procedure and Characterization of bpy-TEMPO

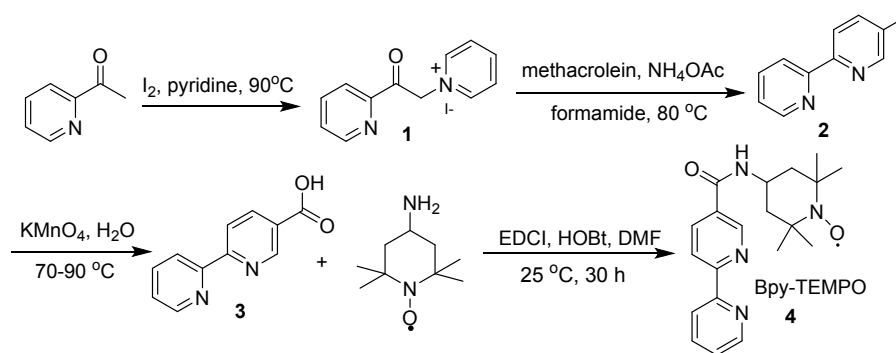

Scheme 1S Synthetic route of the bpy-TEMPO ligand

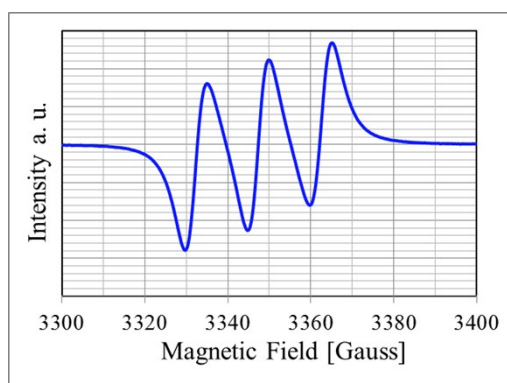

Figure 1S EPR signal of a solution of bpy-TEMPO in MeCN under ambient atmosphere at room temperature.

## Mass data and spectra

HRMS (ESI) for  $C_{20}H_{26}N_4O_2$   $[M+H]^+$ , calcd: 354.2011, found: 354.2064

### User Spectra

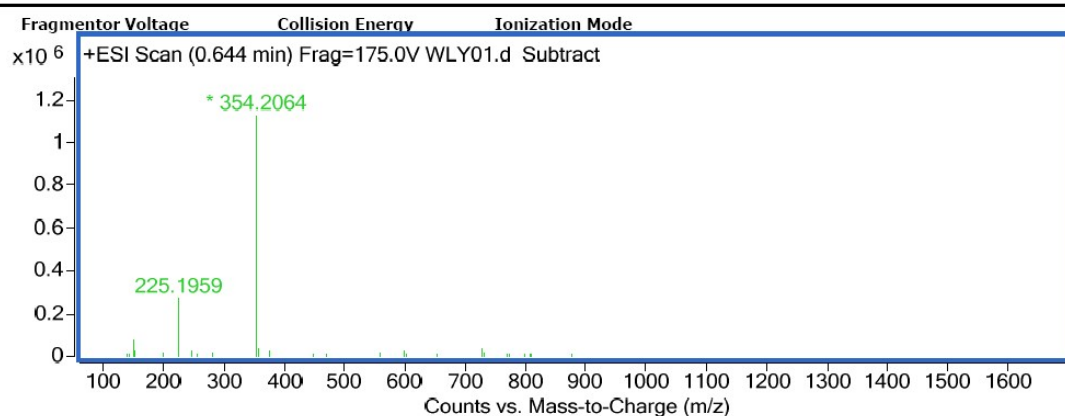

# 1-(2-Pyridylacetyl)pyridinium iodide

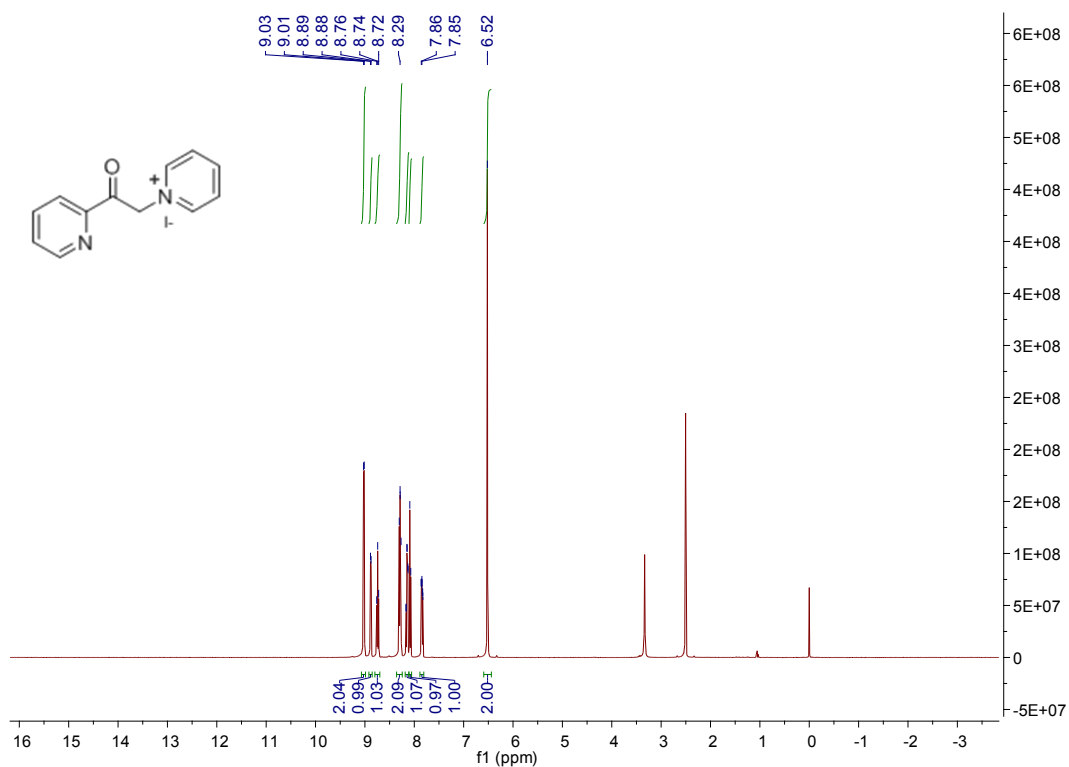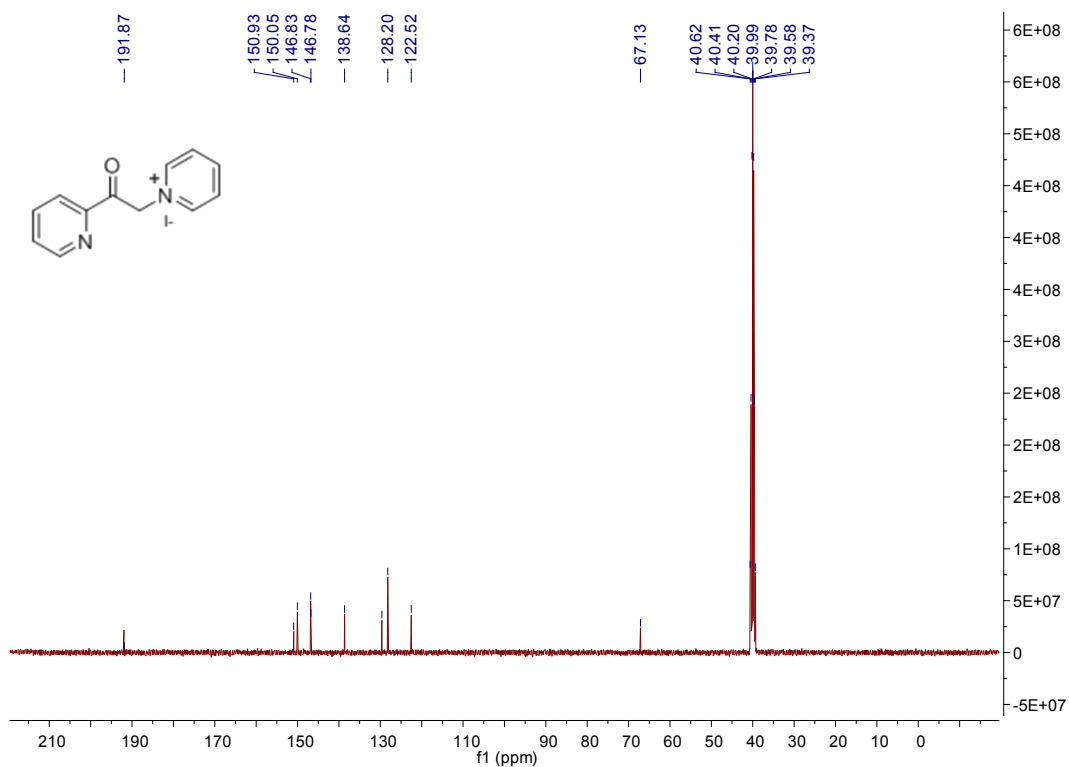

# 5-Methyl-2,2'-bipyridine

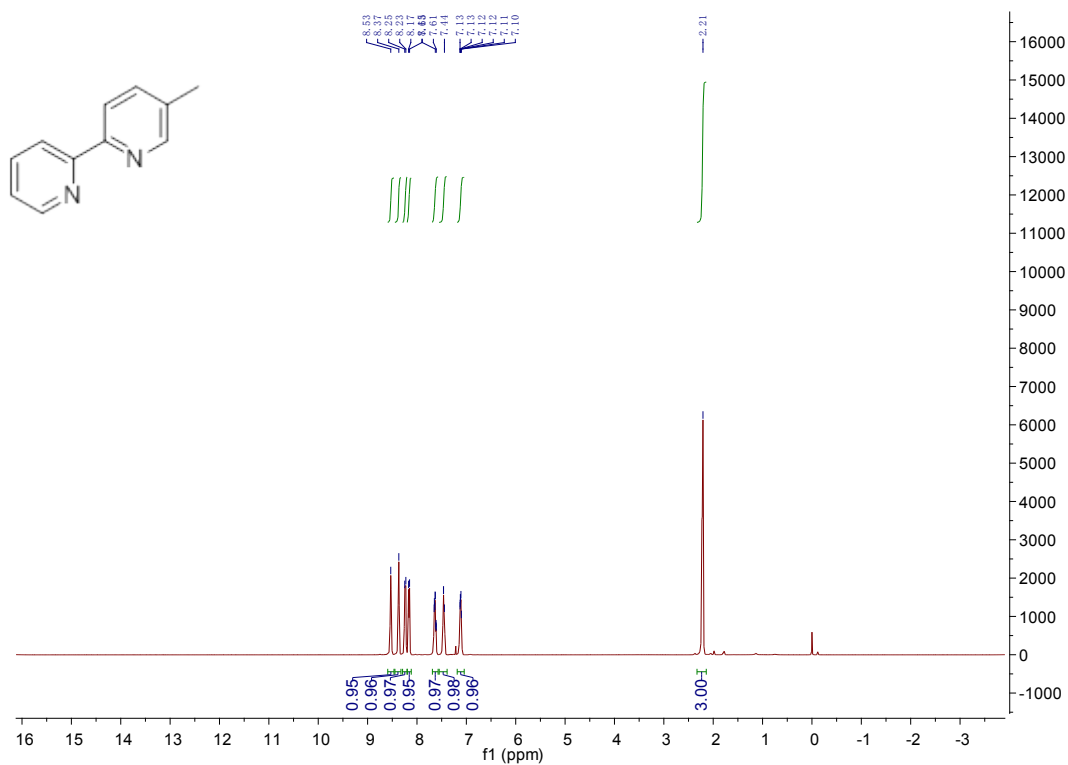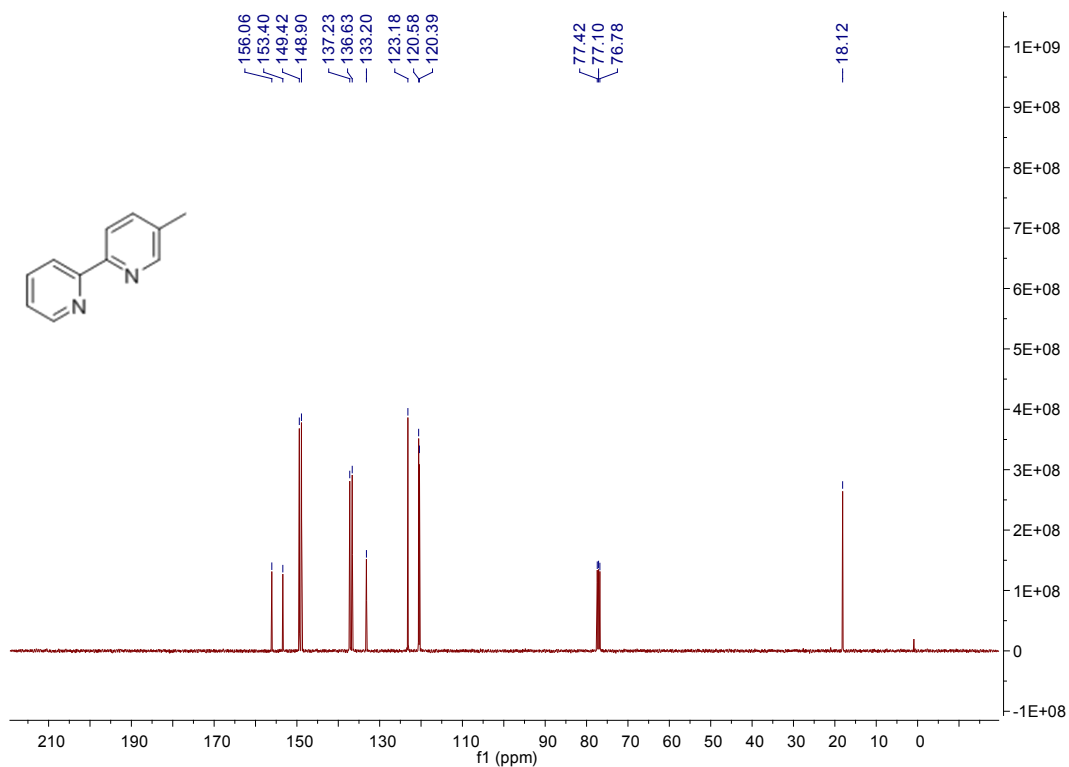

# 2,2-Bipyridinyl-5-carboxylic acid

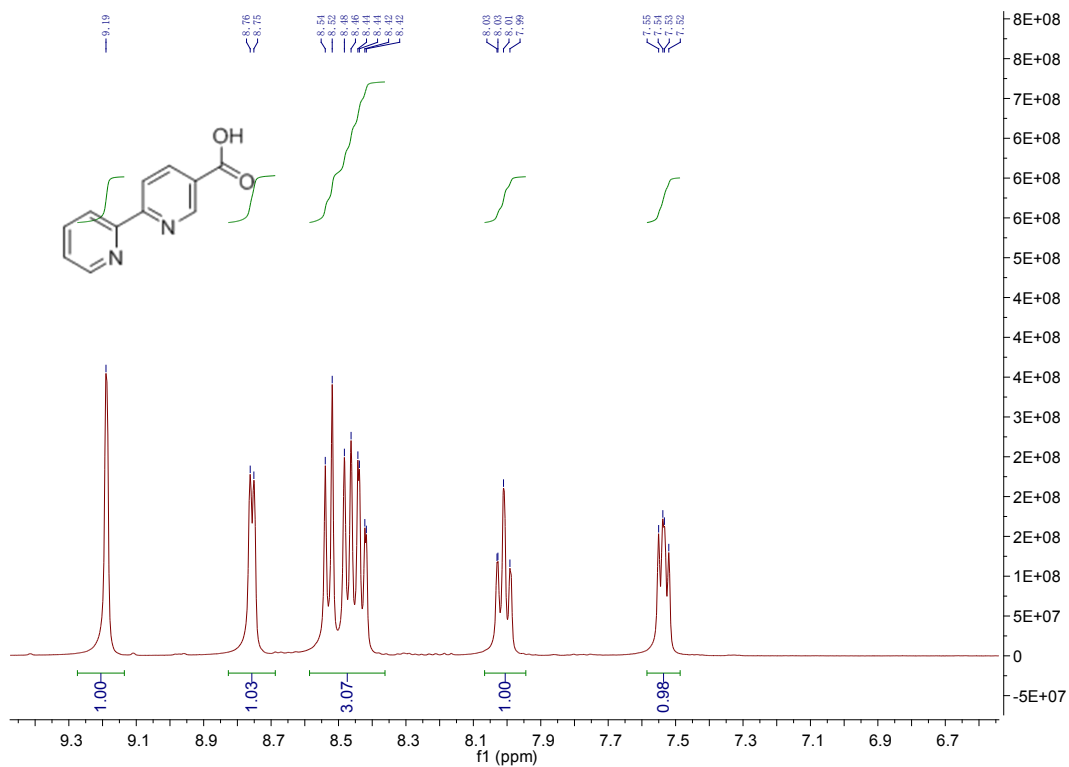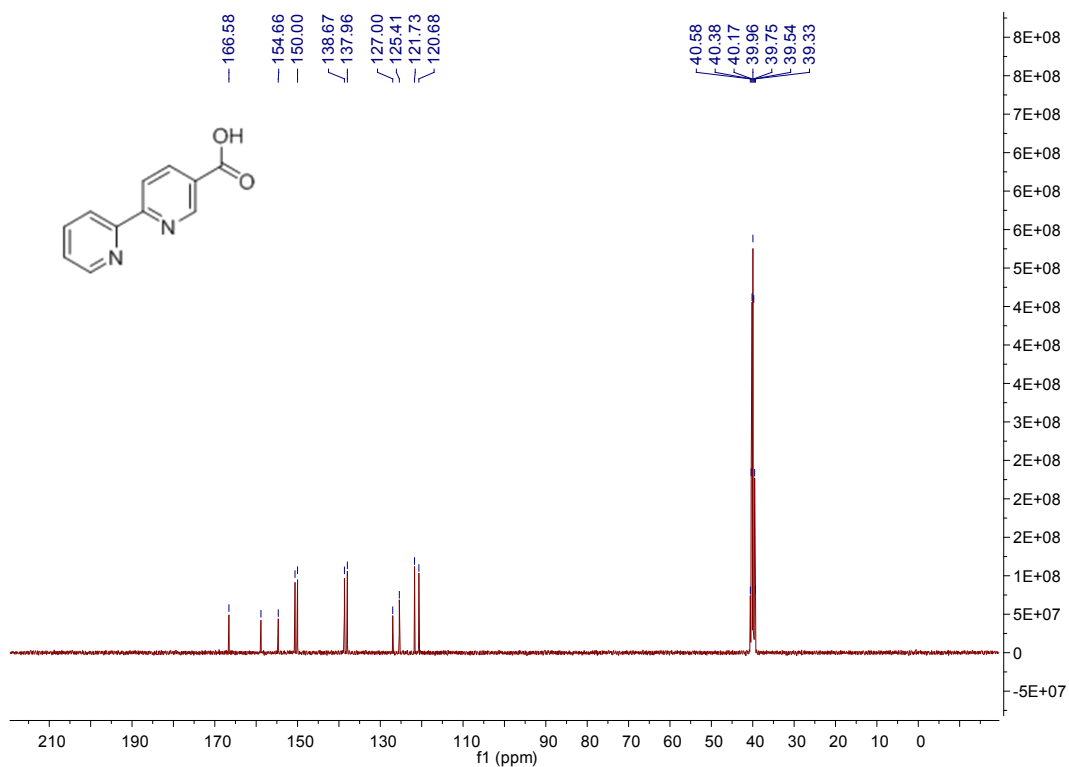

# Tetradecanal (Table 2, entry 3)

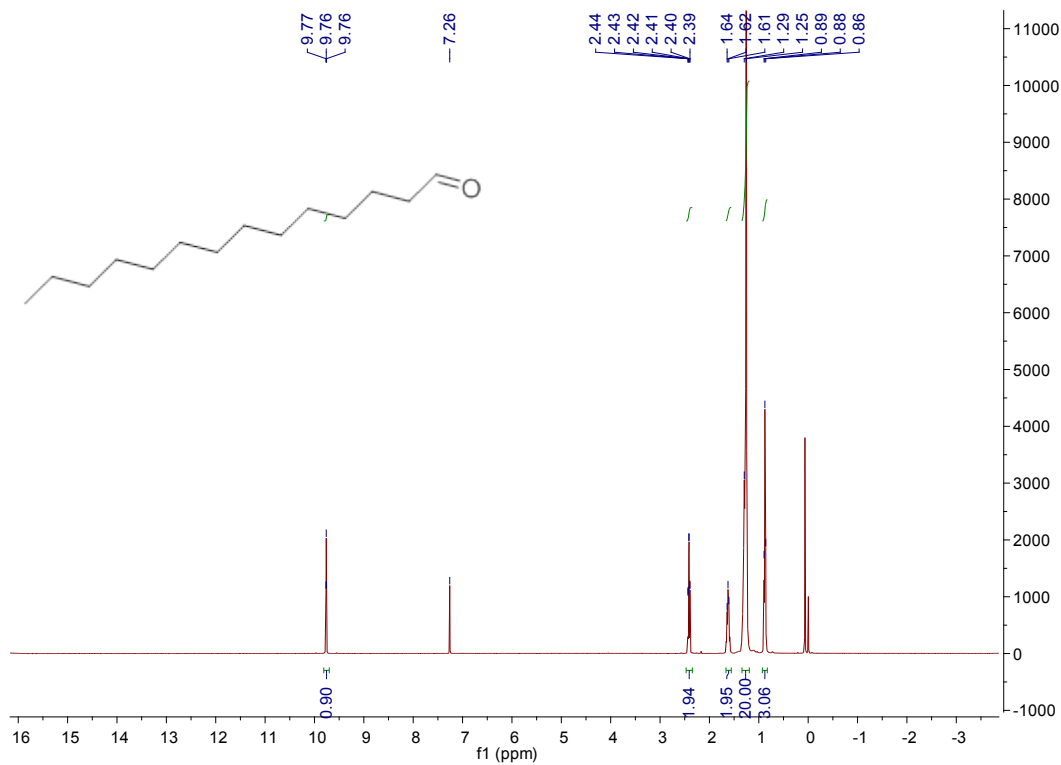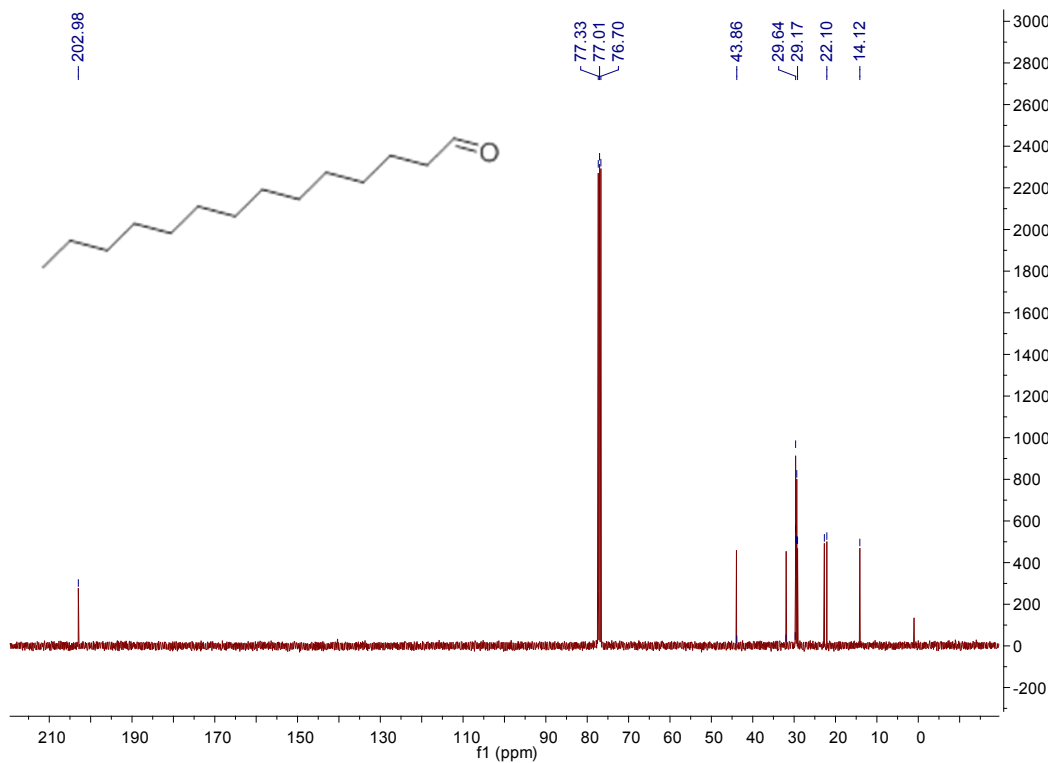



# Cinnamaldehyde (Table 2, entry 9)

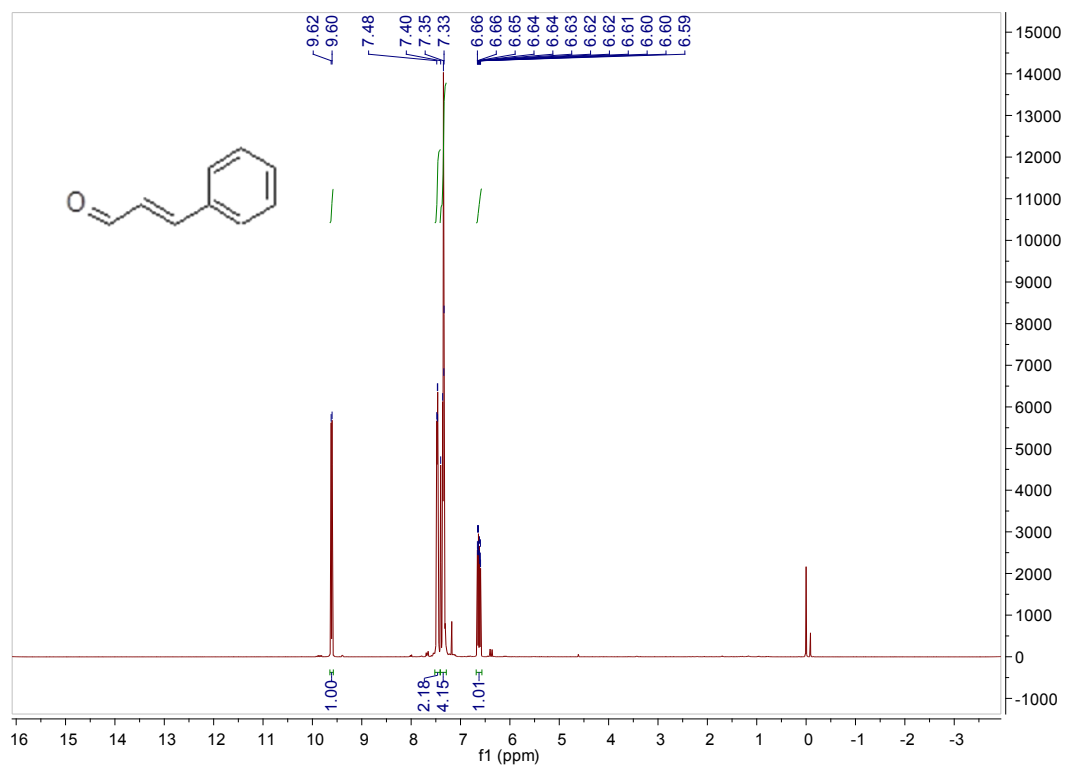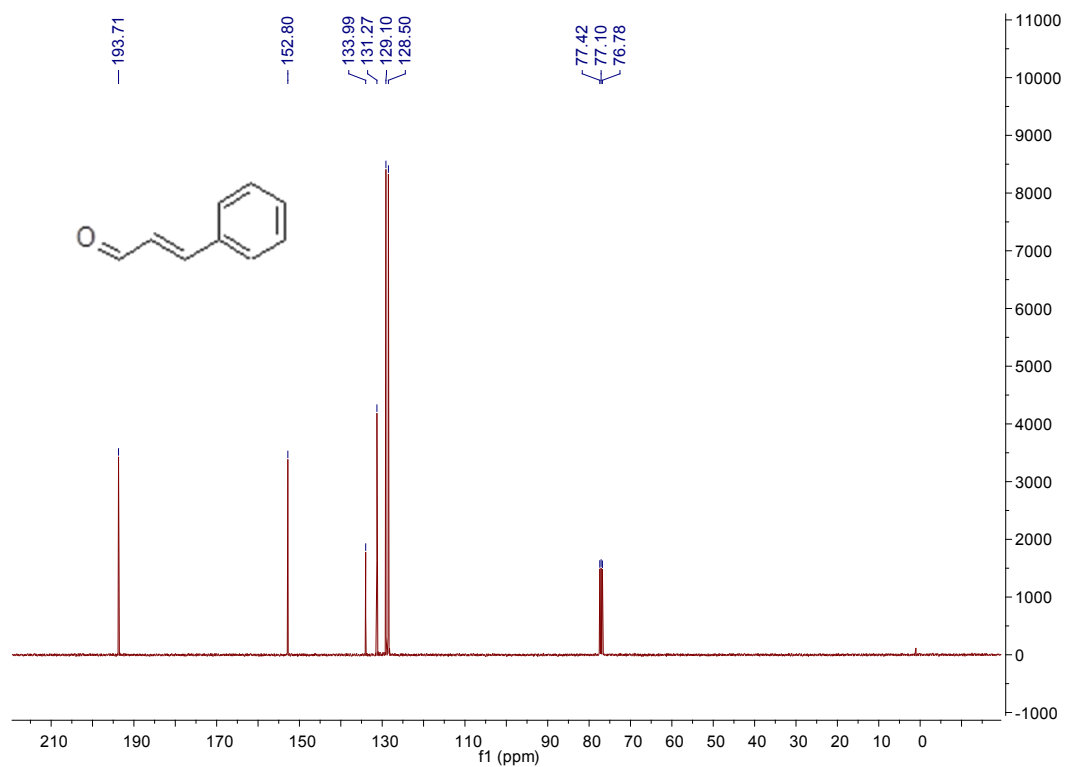

# Phenylpropiolaldehyde (Table 2, entry 12)

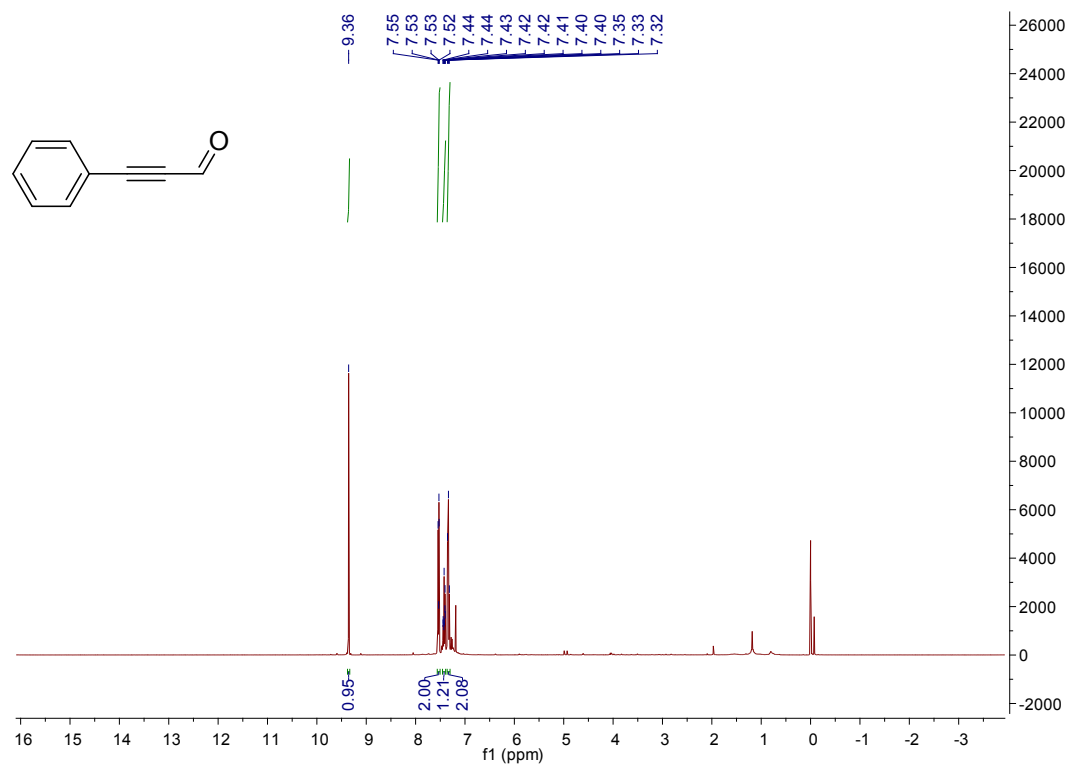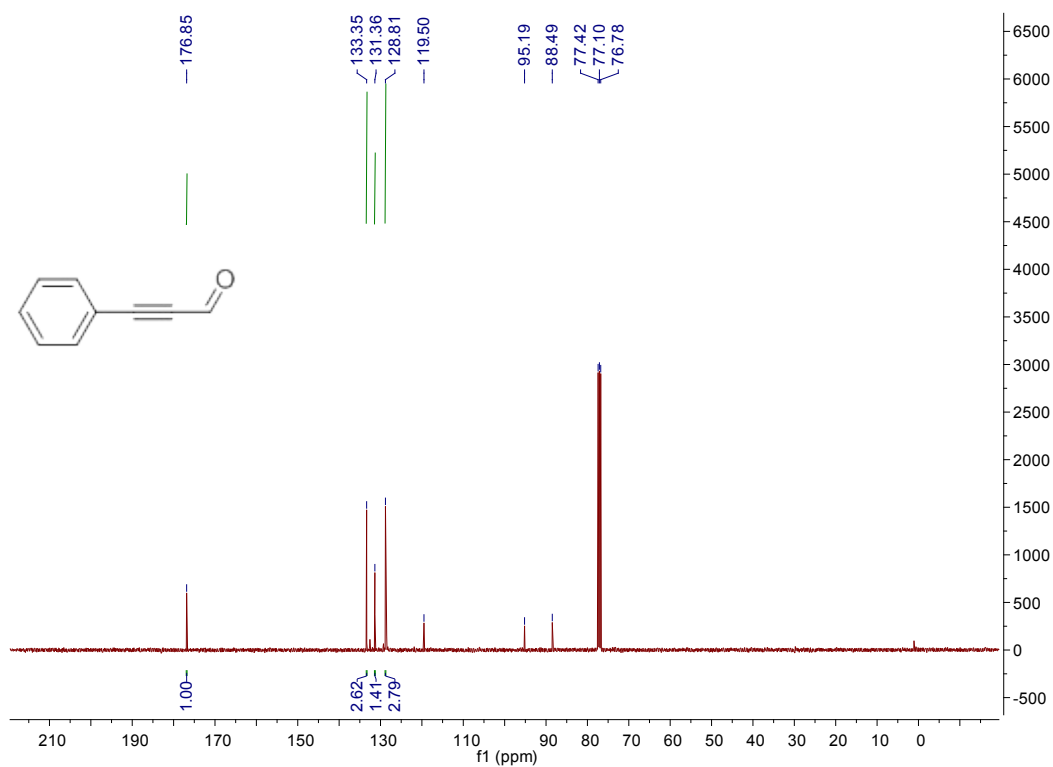

# Benzaldehyde (Table 2, entry 14)

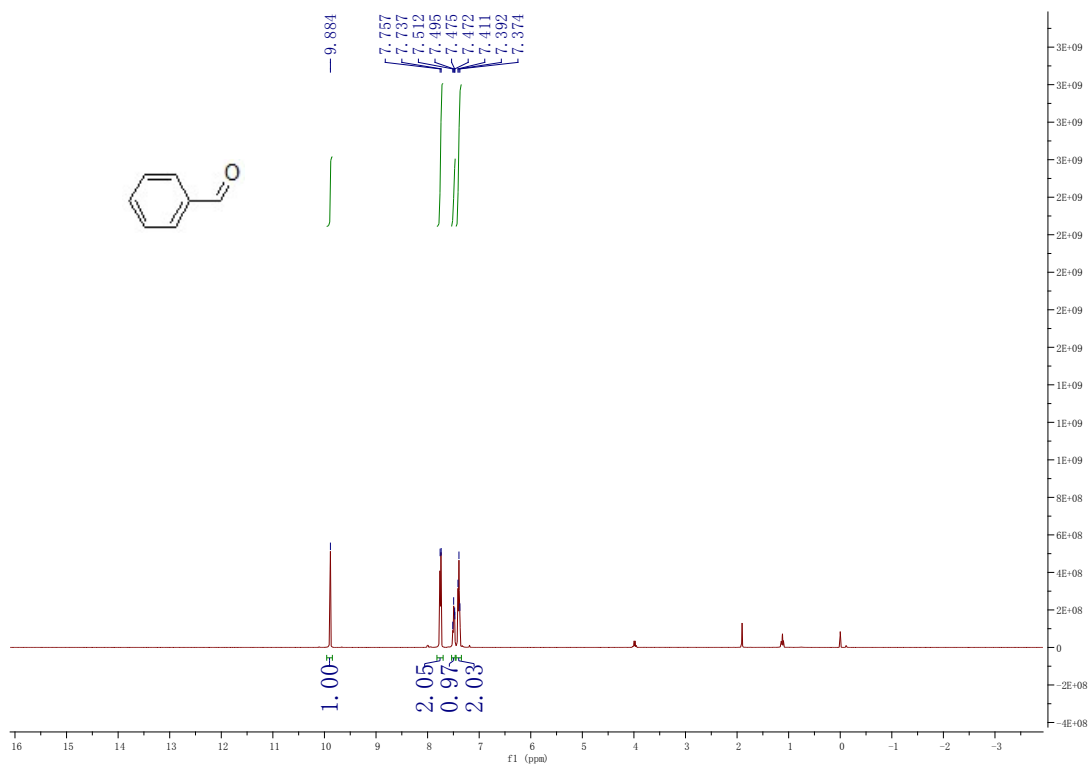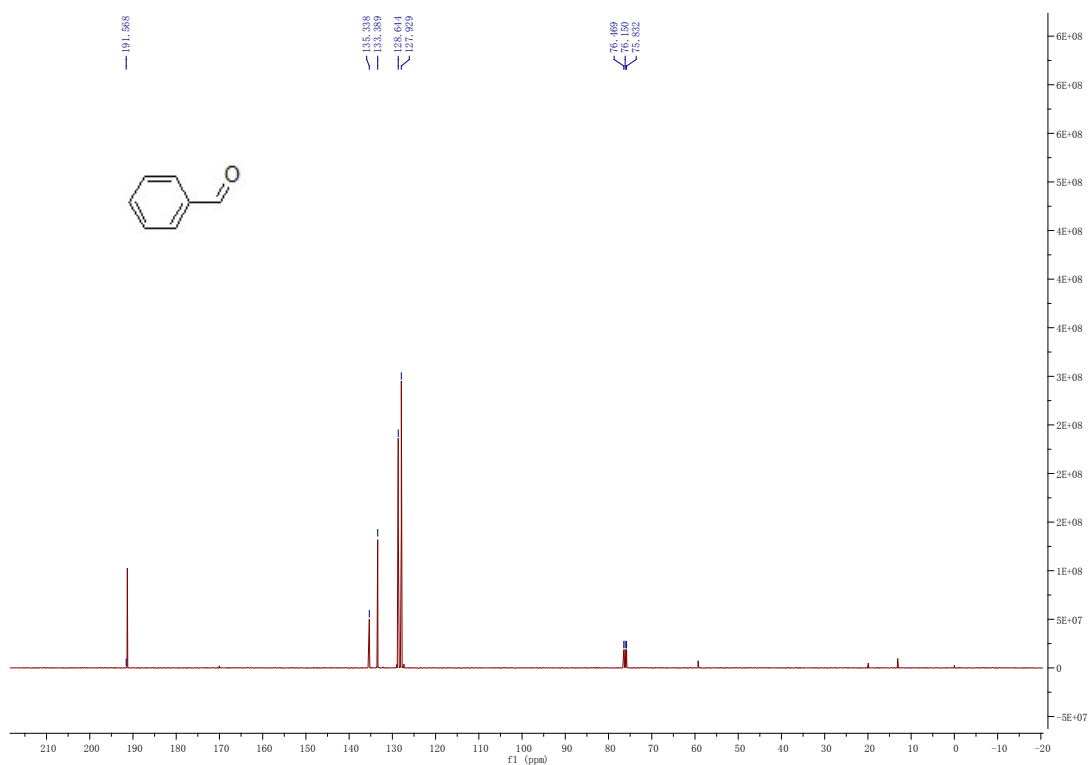

### 4-Methylbenzaldehyde (Table 2, entry 15)

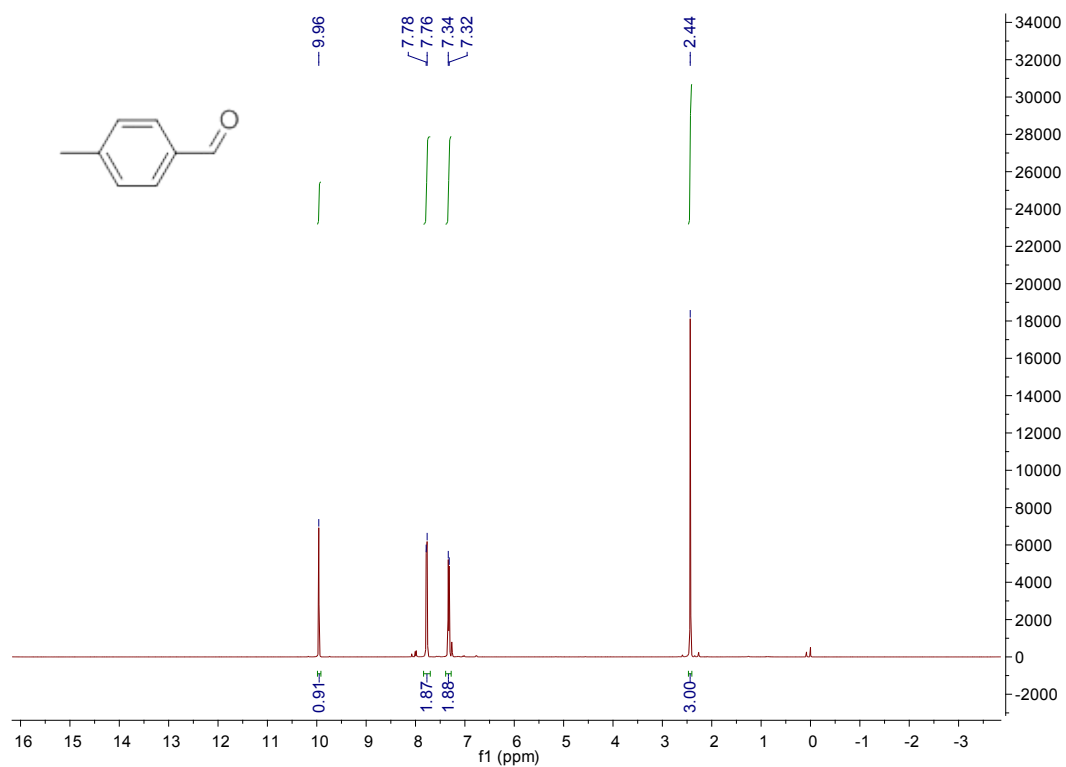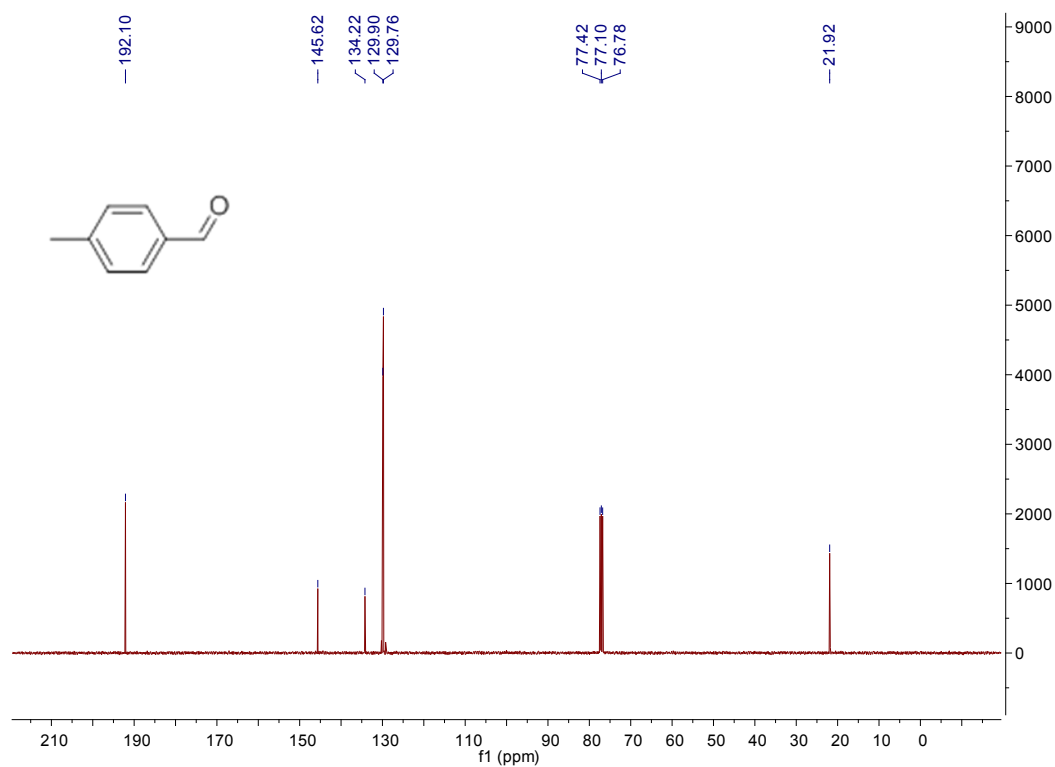

### 4-Fluorobenzaldehyde (Table 2, entry 18)

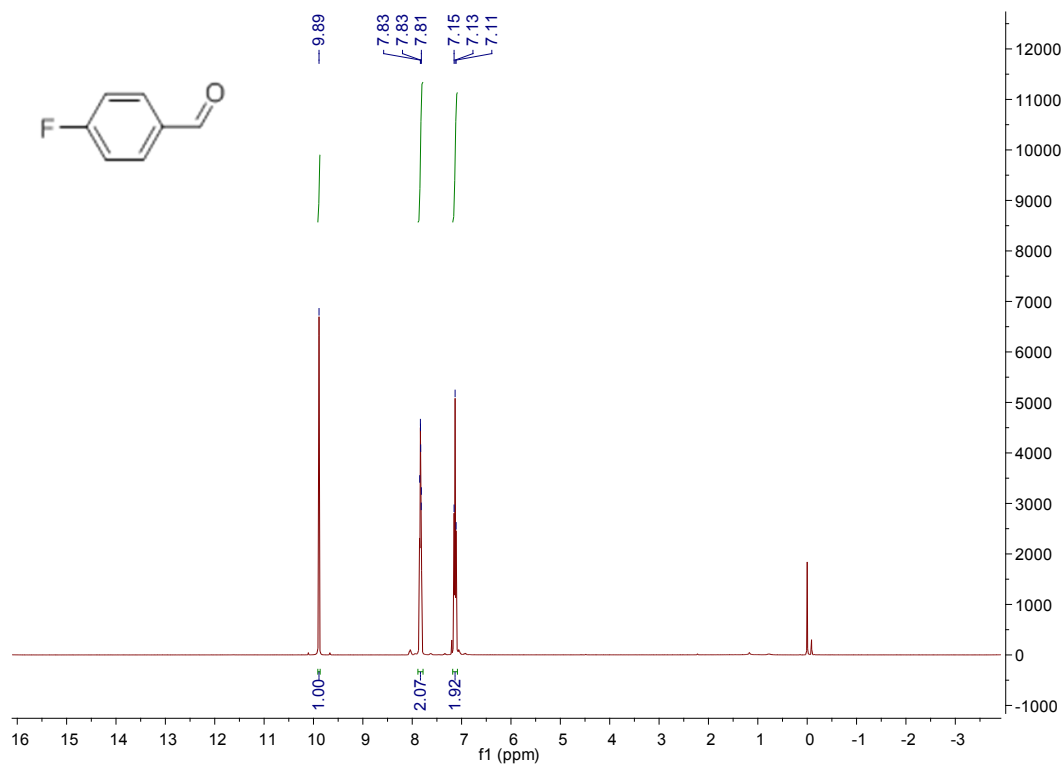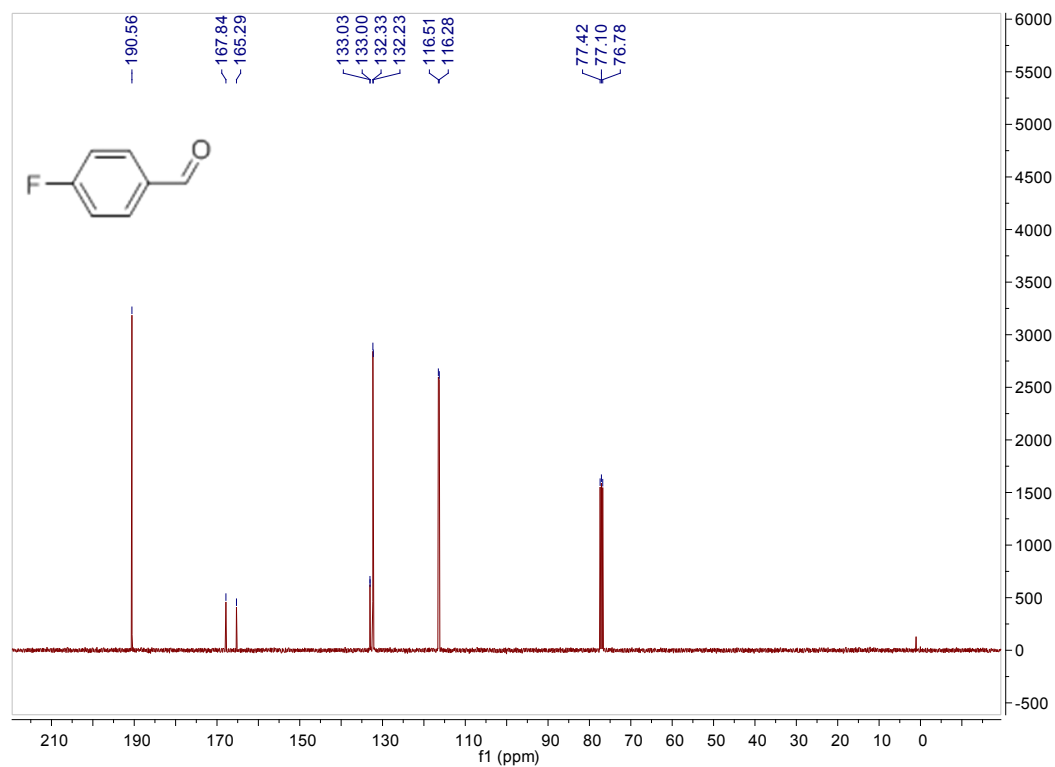

### 4-Nitrobenzaldehyde (Table 2, entry 17)

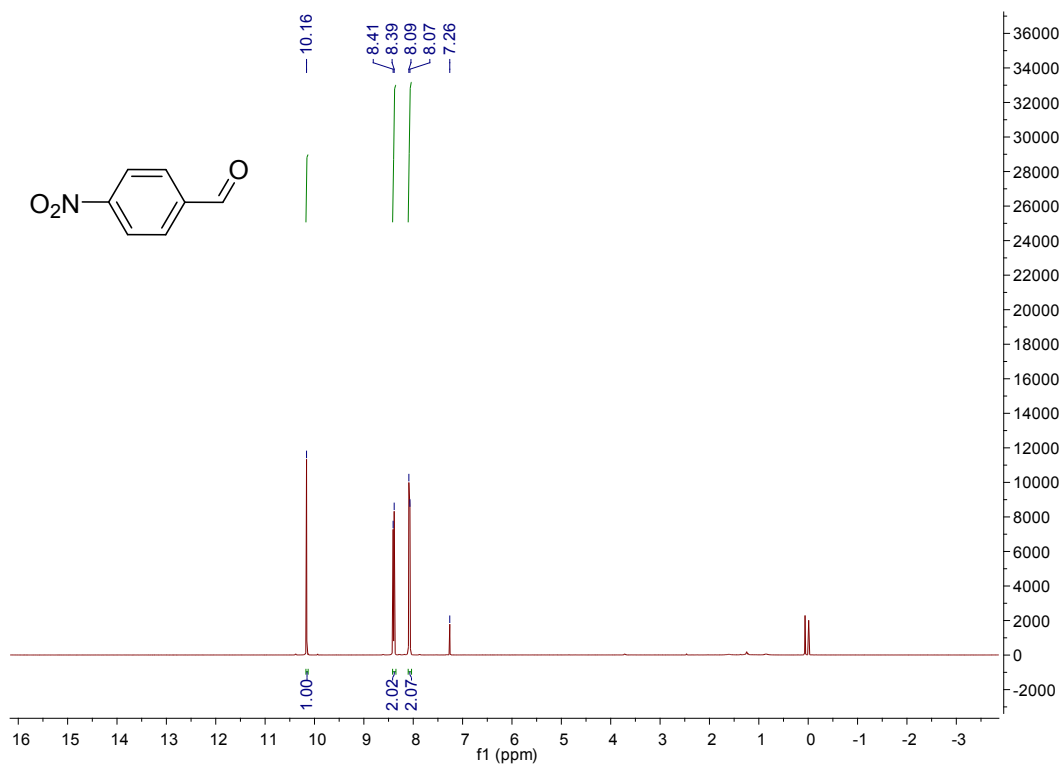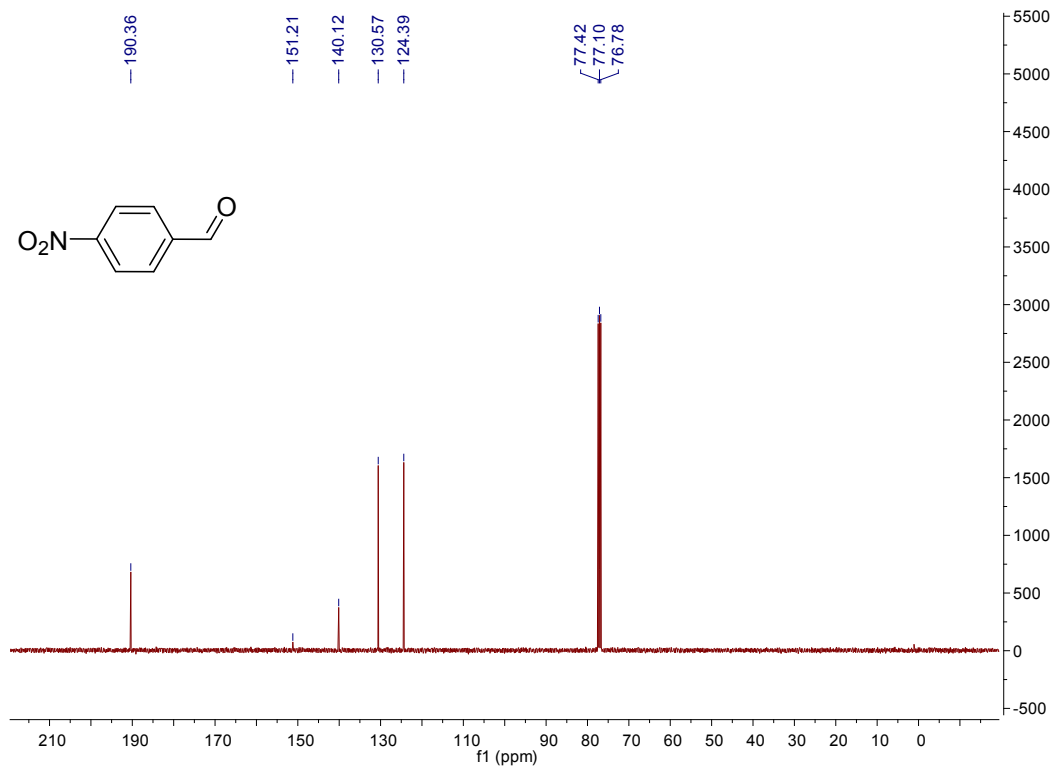

### 3,4-Dimethoxybenzaldehyde (Table 2, entry 21)

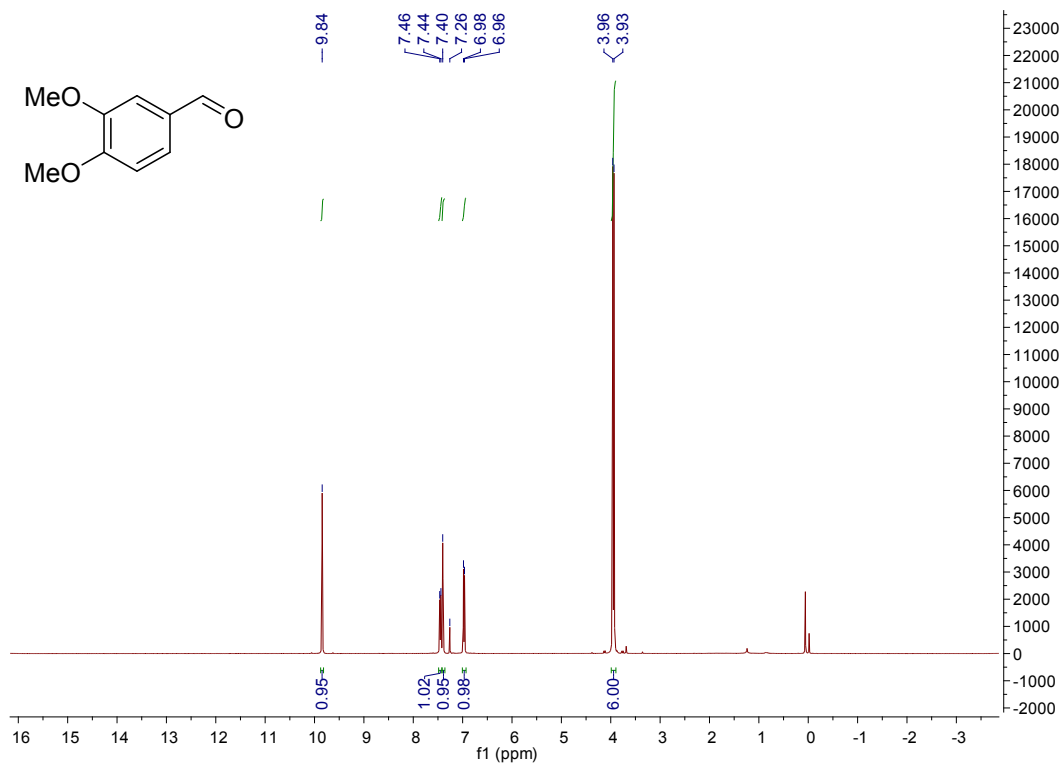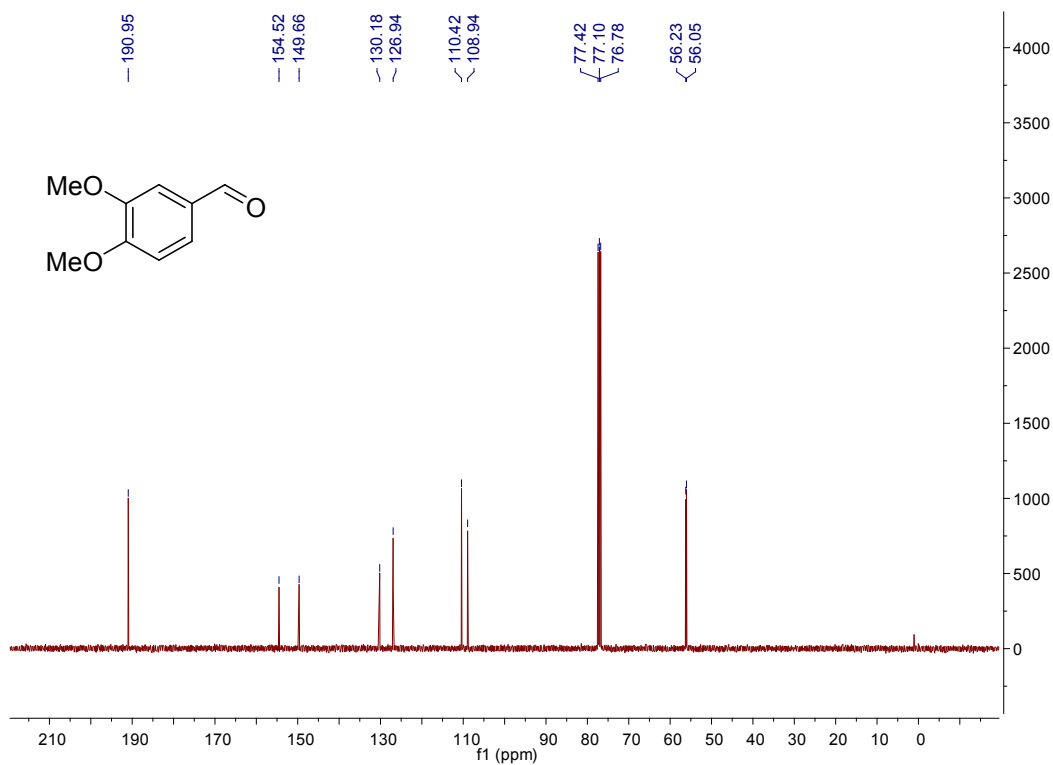

# 1-Naphthaldehyde (Table 2, entry 22)

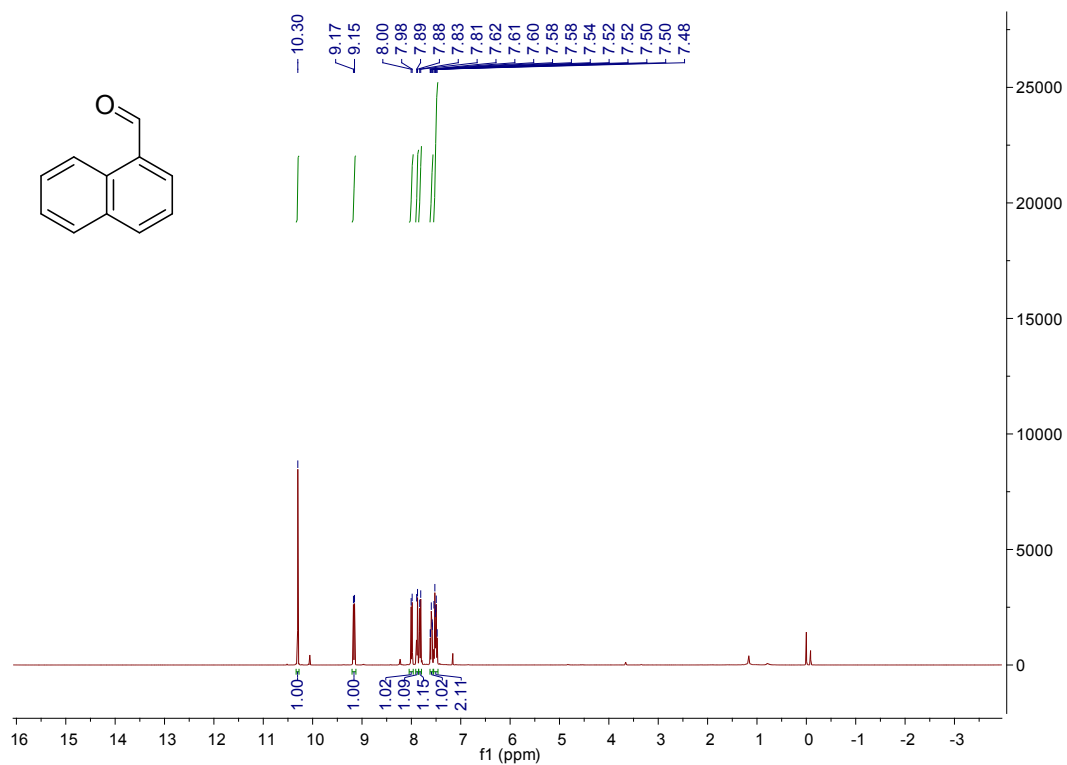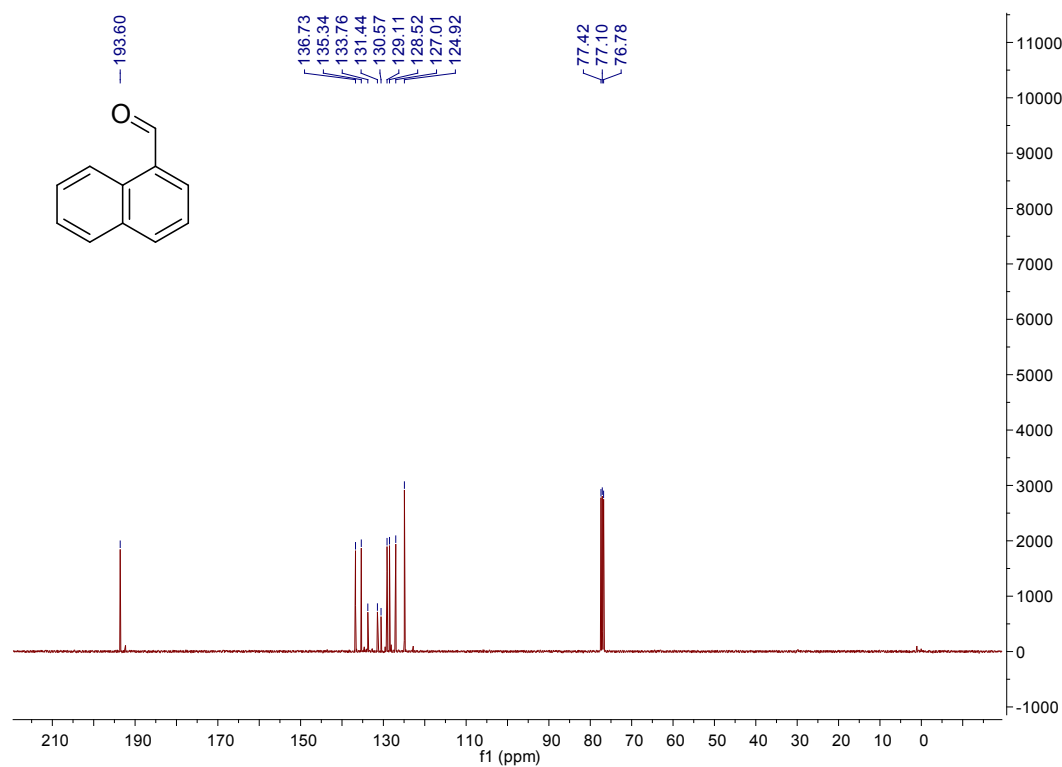

Supplement: c6ra05536b1.pdf [file c6ra05536b1.pdf]
